# Supplementary material for: Characterization of The Expression of The Heavy Chain of 4F2 Antigen As a Therapeutic Target in Prostate Cancer
Source: Research Square preprint supplement (doi:10.21203/rs.3.rs-112482/v1), 2020-12-01

## **Characterization of the expression of the heavy chain of 4F2 antigen as a therapeutic target in prostate cancer**

Maihulan Maimaiti<sup>1,2</sup>, †Shinichi Sakamoto<sup>1\*</sup>, Masahiro Sugiura<sup>1,3</sup>, Minhui Xu<sup>4</sup>, Keisuke Ando<sup>1,5</sup>, Shinpei Saito<sup>1,5</sup>, Ken Wakai<sup>1,2</sup>, Yusuke Imamura<sup>1</sup>, Yoshikatsu Kanai<sup>4</sup>, Atsushi Kaneda<sup>3</sup>, Yuzuru Ikehara<sup>2</sup>, Naohiko Anzai<sup>5</sup>, Tomohiko Ichikawa<sup>1</sup>

<sup>1</sup> *Department of Urology, Chiba University Graduate School of Medicine, Chiba, Japan*

<sup>2</sup> *Department of Tumor Pathology, Chiba University Graduate School of Medicine, Chiba, Japan*

<sup>3</sup> *Department of Molecular Oncology, Chiba University Graduate School of Medicine, Chiba, Japan*

<sup>4</sup> *Bio-system Pharmacology, Osaka University Graduate School of Medicine, Osaka, Japan*

<sup>5</sup> *Department of Pharmacology, Chiba University Graduate School of Medicine, Chiba, Japan*

\*Corresponding author: Shinichi Sakamoto

Chiba University Graduate School of Medicine

1-8-1 Inohana, Chuo-ku, Chiba City, Chiba 260-8670, Japan

Tel: +81-43-226-2134; Fax: +81-43-226-2136

Email: rbatbat1@gmail.com

†Equal study contribution

**Table S1.** Primer sequences for real-time PCR

| Gene            | Primer Type | Sequence (5' to 3')          |
|-----------------|-------------|------------------------------|
| <i>4F2hc</i>    | Forward     | ACCCCTGTTTTTCAGCTACGG        |
|                 | Reverse     | GGTCTTCACTCTGGCCCTTC         |
| <i>LAT1</i>     | Forward     | AGGAGCCTTCCTTTCTCCTG         |
|                 | Reverse     | CTGCAAACCCTAAGGCAGAG         |
| <i>SKP2</i>     | Forward     | GATGTGACTGGTCGGTTGCTGT       |
|                 | Reverse     | GAGTTCGATAGGTCCATGTGCTG      |
| <i>MYBL2</i>    | Forward     | AAAACAGTGAGGAGGAAC           |
|                 | Reverse     | CAGGGAGGTCAAATTTAC           |
| <i>FOX M1</i>   | Forward     | GCATGAGGATGATTCTGACCT        |
|                 | Reverse     | GATCTGTGGACCACAAGATC         |
| <i>H2AFX</i>    | Forward     | GGGCCTAGCTATCCCTCTCCCT       |
|                 | Reverse     | CTGCAAAAGTTCCAGTTCAGAAGCCAGA |
| <i>ARHGAP19</i> | Forward     | AGATCTATGGCGACTGAGGCACAGAG   |
|                 | Reverse     | GAATTCTGCATGGACCATAGGAGACA   |

**Table S2.** Comparison of clinical factors between LAT1 Low and LAT1 High groups

|              | LAT1 Low     | LAT1 High    | P             |
|--------------|--------------|--------------|---------------|
| Age (y)      | 66.00 ± 5.39 | 65.50 ± 5.32 | 0.5578        |
| cT stage (n) |              |              | 0.3108        |
| 1            | 17           | 36           |               |
| 2            | 2            | 11           |               |
| 3            | 3            | 8            |               |
| GS (n)       |              |              | 0.0399      * |
| 6            | 11           | 13           |               |
| 7            | 7            | 29           |               |
| 8            | 4            | 8            |               |
| 9            | 3            | 9            |               |
| TST (ng/dL)  | 5.49 ± 2.16  | 4.61 ± 1.72  | 0.0928        |
| PSA (ng/mL)  | 10.07 ± 6.79 | 7.53 ± 6.40  | 0.7046        |
| PSAD         | 0.27 ± 0.26  | 0.30 ± 0.29  | 0.4738        |

Data are expressed as means ± standard deviation unless otherwise indicated. cT stage = clinical tumour stage, GS = Gleason score, TST = testosterone, PSA = prostate-specific antigen, PSAD = PSA density

Figure S1. Associations among 4F2hc, SKP, and LAT1 expressions. The expression of 4F2hc in C4-2 cells is inhibited by si4F2hc (A). Knocked down expression of 4F2hc inhibits expression of SKP2 and LAT1 (B and C). The expression of SKP2 in C4-2 cells is inhibited by siSKP2 (D). Knocked down expression of SKP2 in C4-2 cells using siSKP2 does not affect the expression of 4F2hc and LAT1 in mRNA levels (E and F). Nega indicates negative siRNA control. Data represent three independent experiments with similar results. P-values were calculated by the Mann–Whitney U-test. N.S., no significant difference. \*P<0.05, \*\*P<0.01.

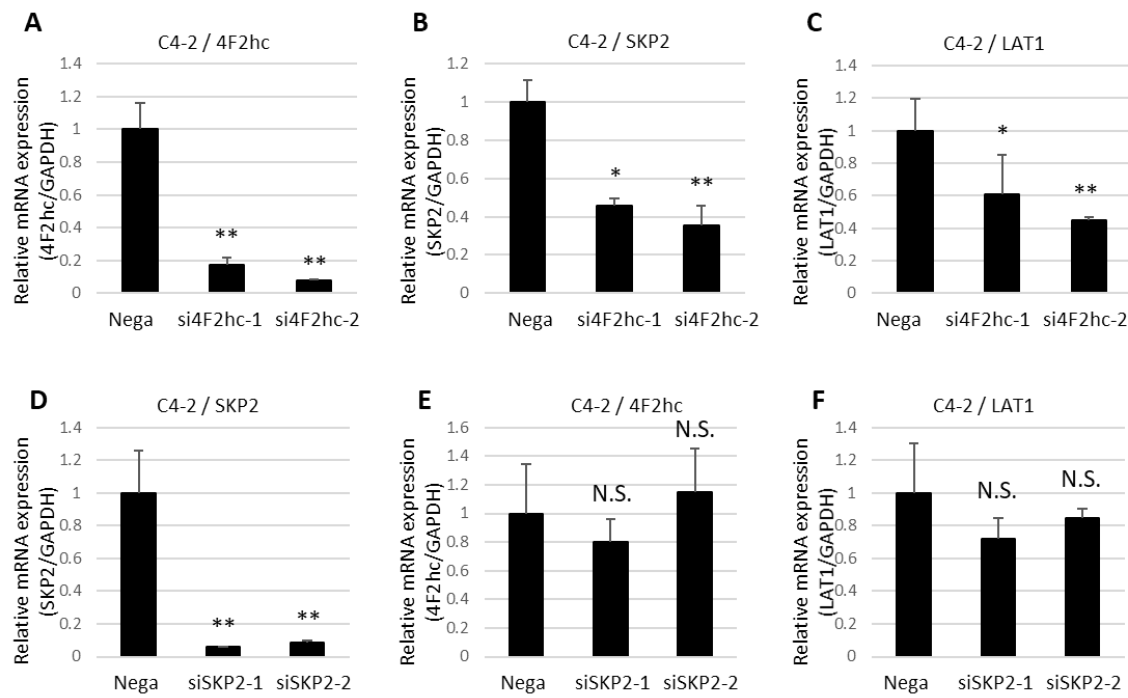

Figure S2. Representative histological sections from prostate cancer tissue. LAT1 expression in PC tissues was analysed by immunohistochemistry. Sections were stained with haematoxylin and eosin (A, a: 600  $\mu$ m and b: 200  $\mu$ m). Representative images of LAT1 immunohistochemical expression (c: 600  $\mu$ m and d: 200  $\mu$ m).

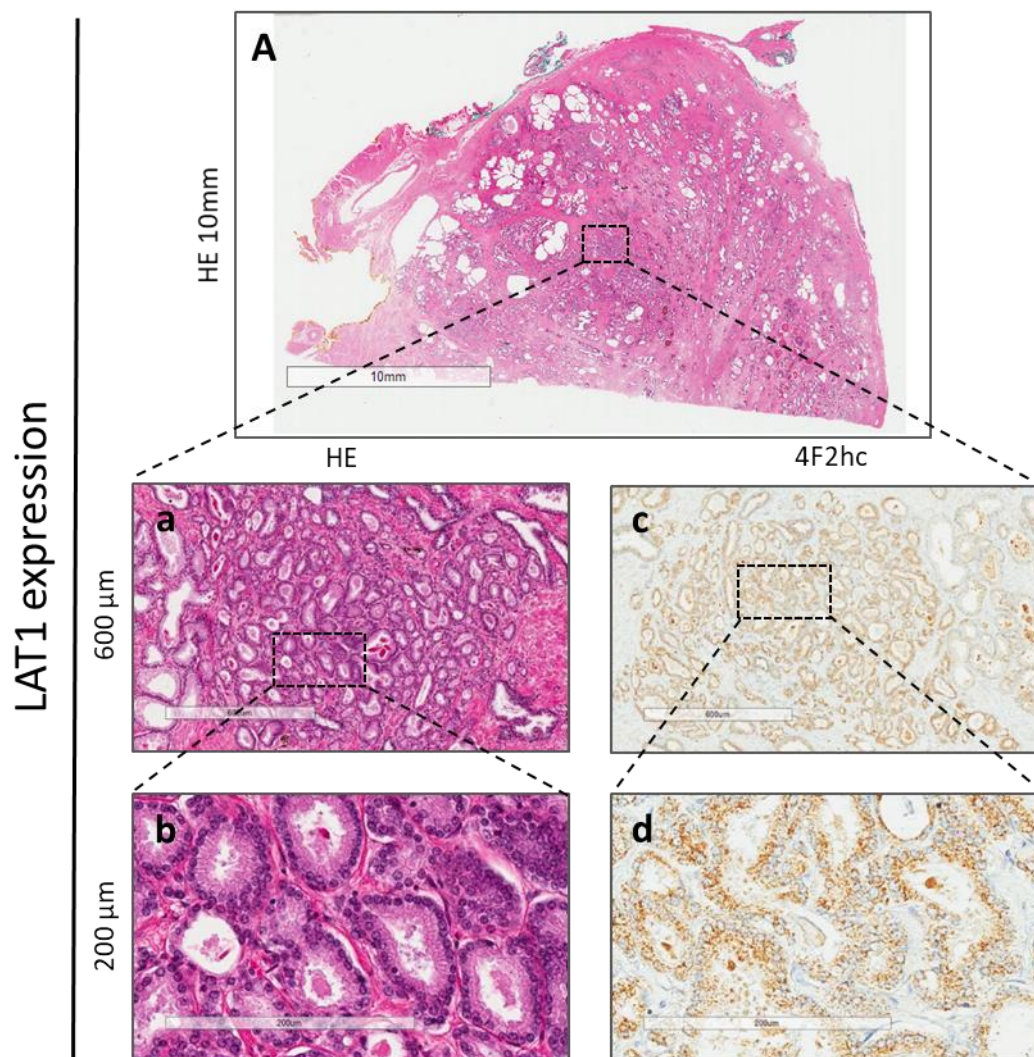

Figure S3. Progression-free survival of PC patients categorized by 4F2hc and LAT1 expression. Prognostic significance of LAT1 expression for PFS (A). Prognostic significance of high 4F2hc/high LAT1 expression and low 4F2hc/lowLAT1 expression. Others are low 4F2hc/high LAT1 or high 4F2hc/low LAT1 (C). N.S. No significant difference. \*\* $p < 0.01$ .

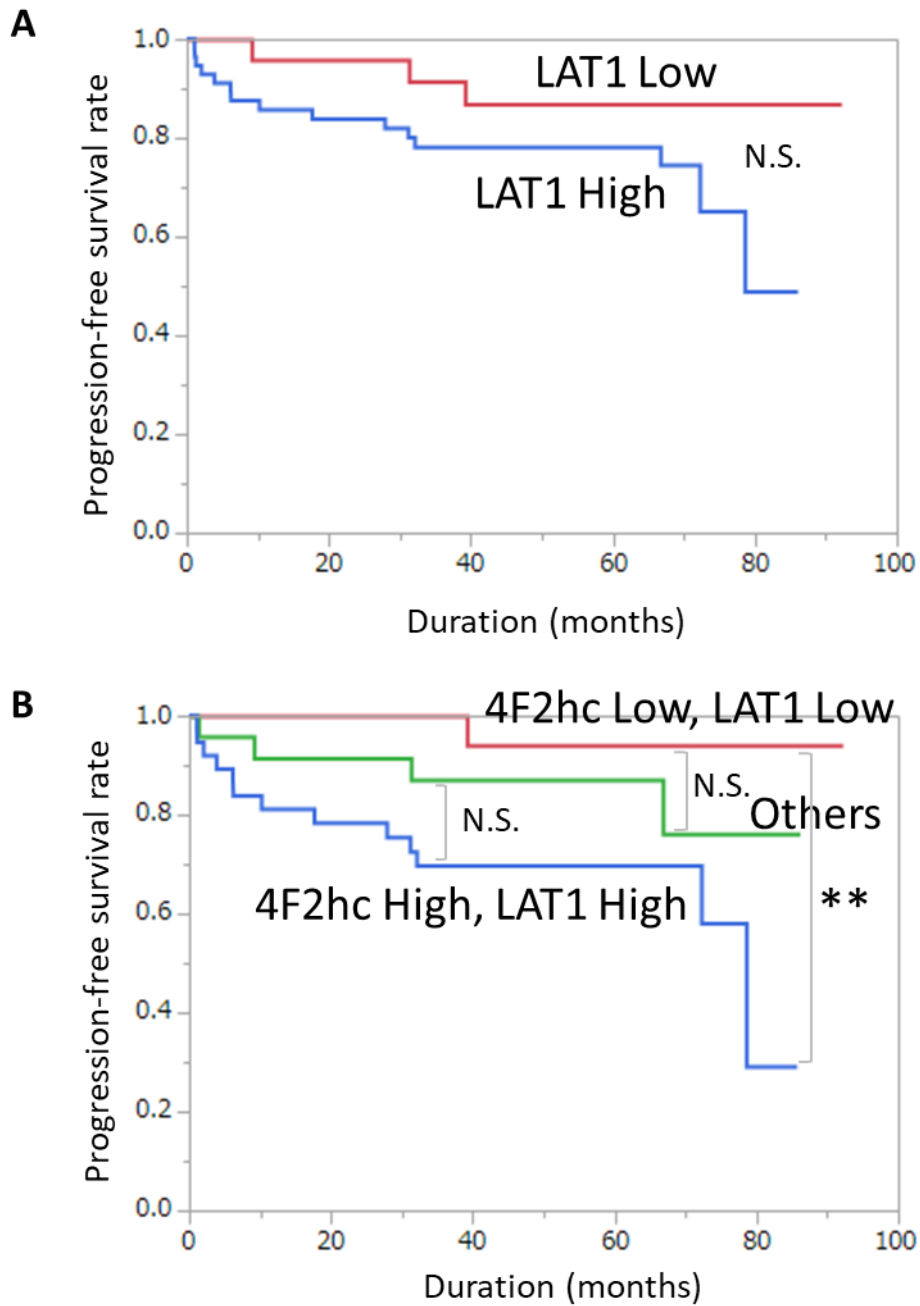

Uncropped Data

Figure1A

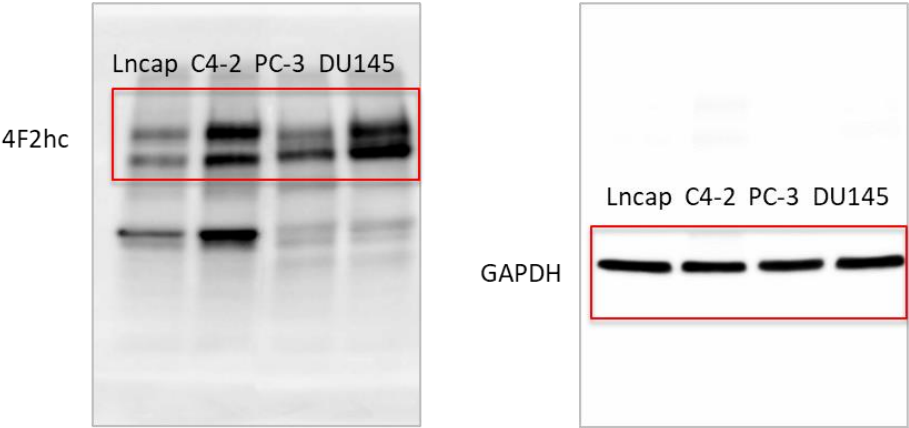

Figure1D

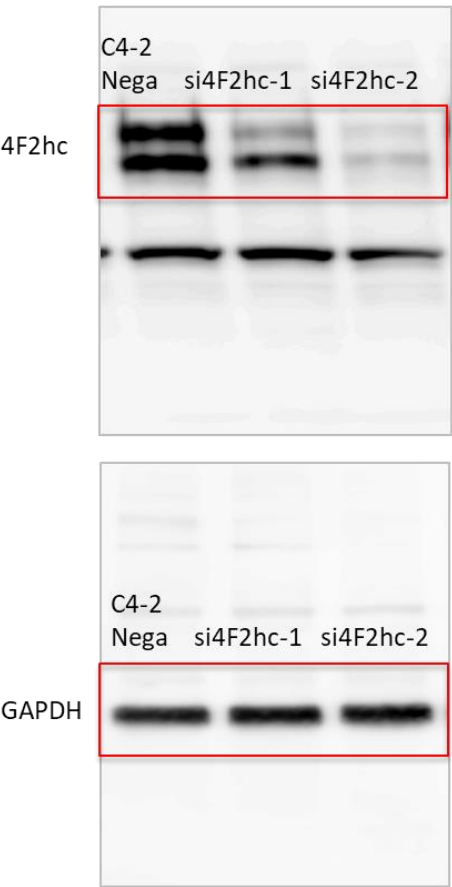

Figure1E

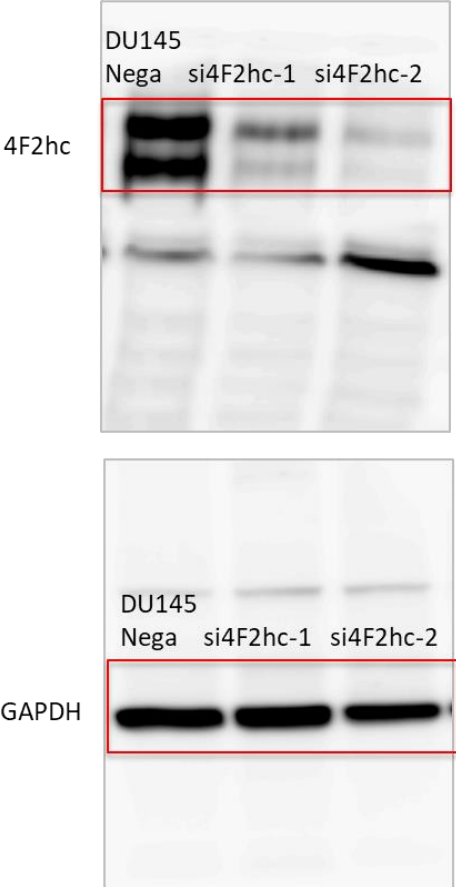

Figure4E

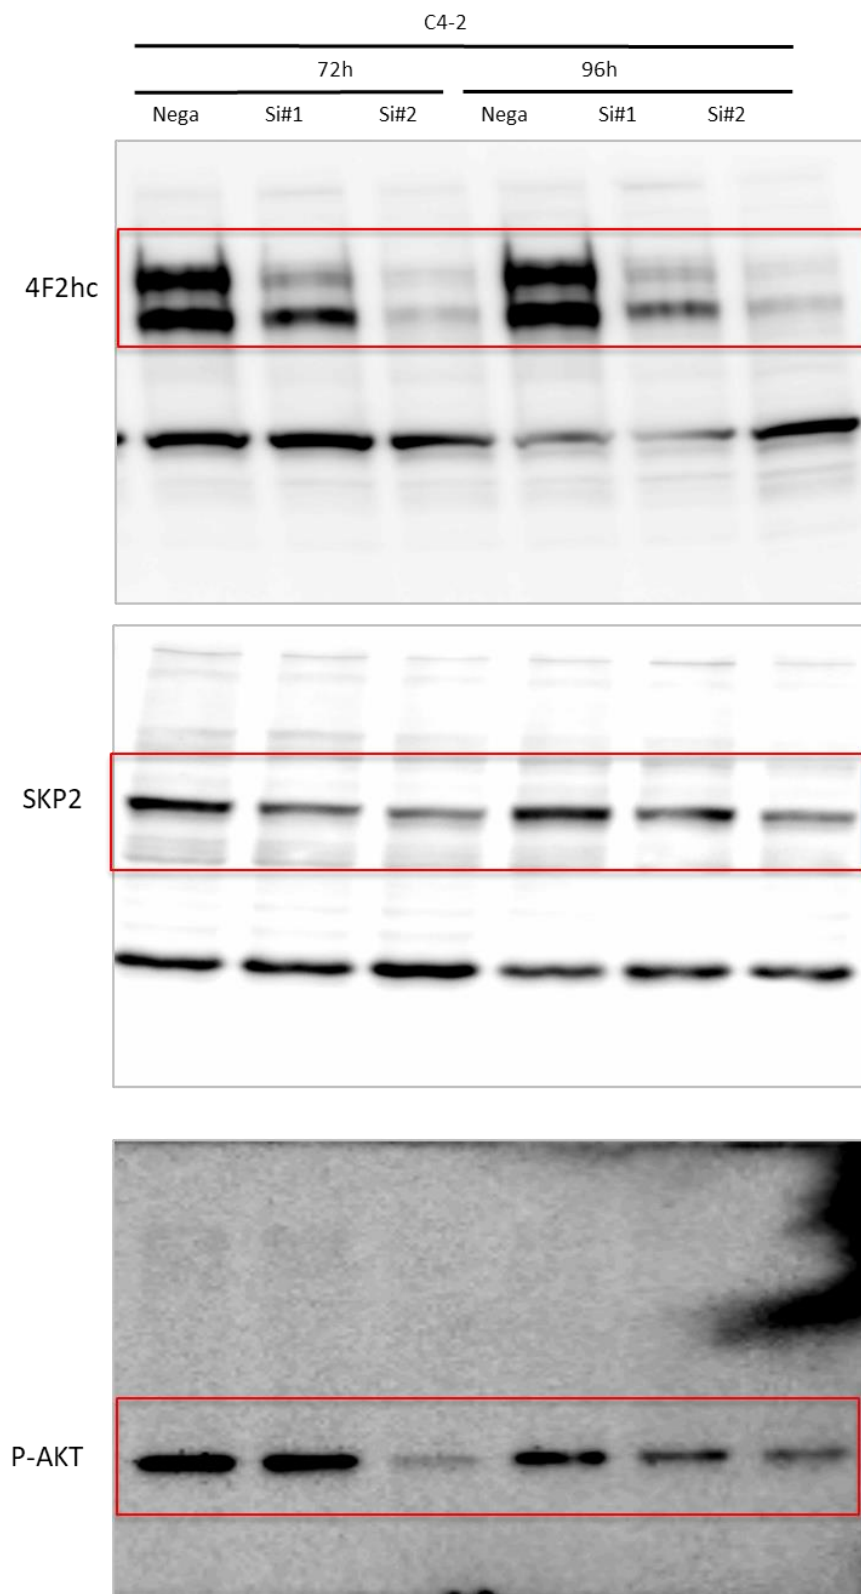



Figure4E

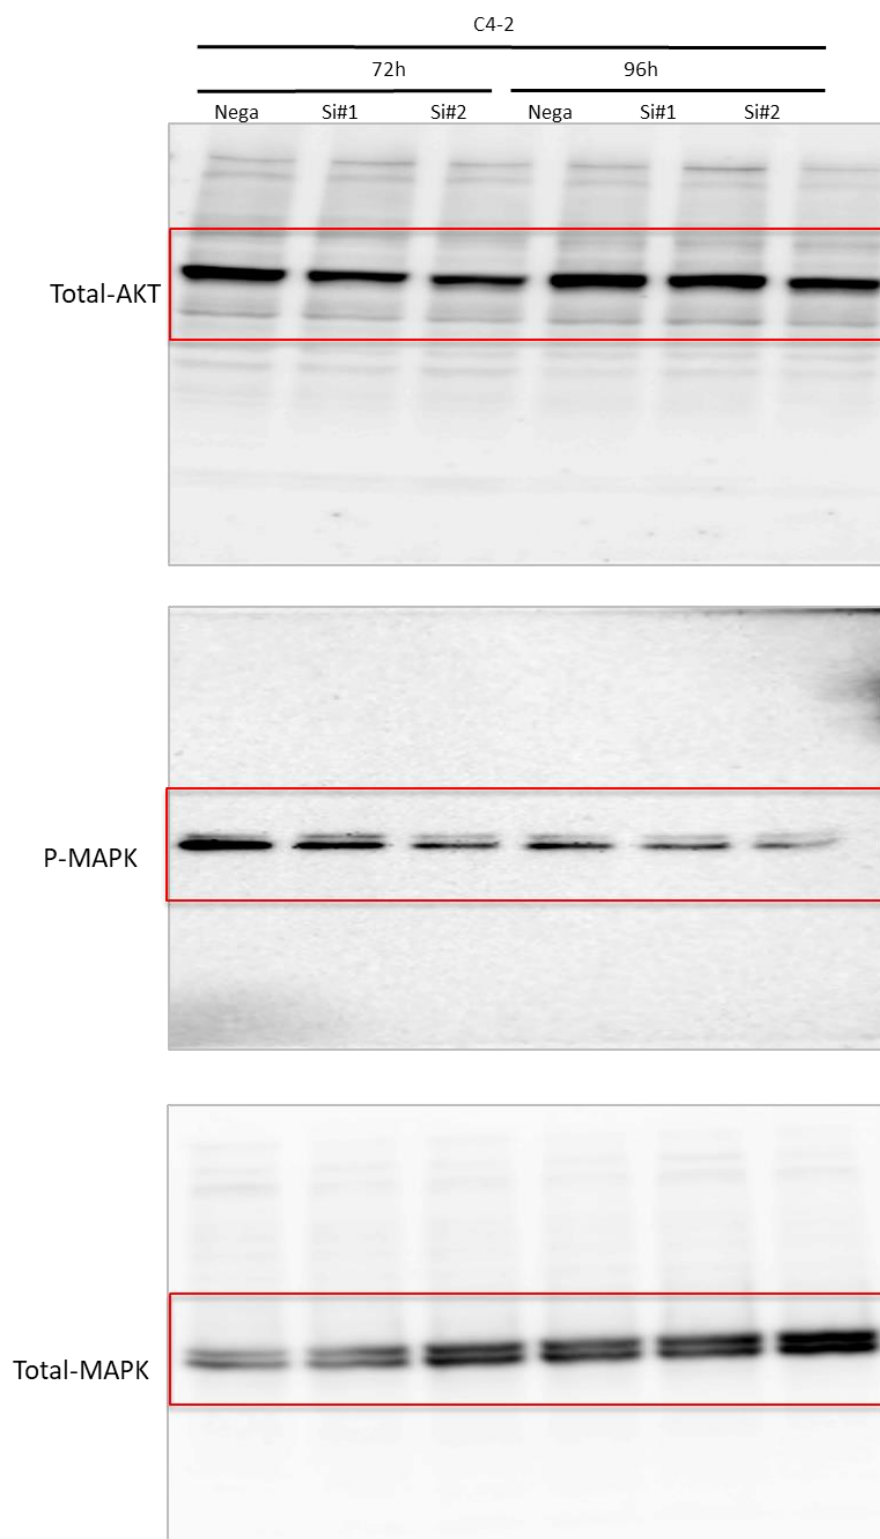

Figure4E

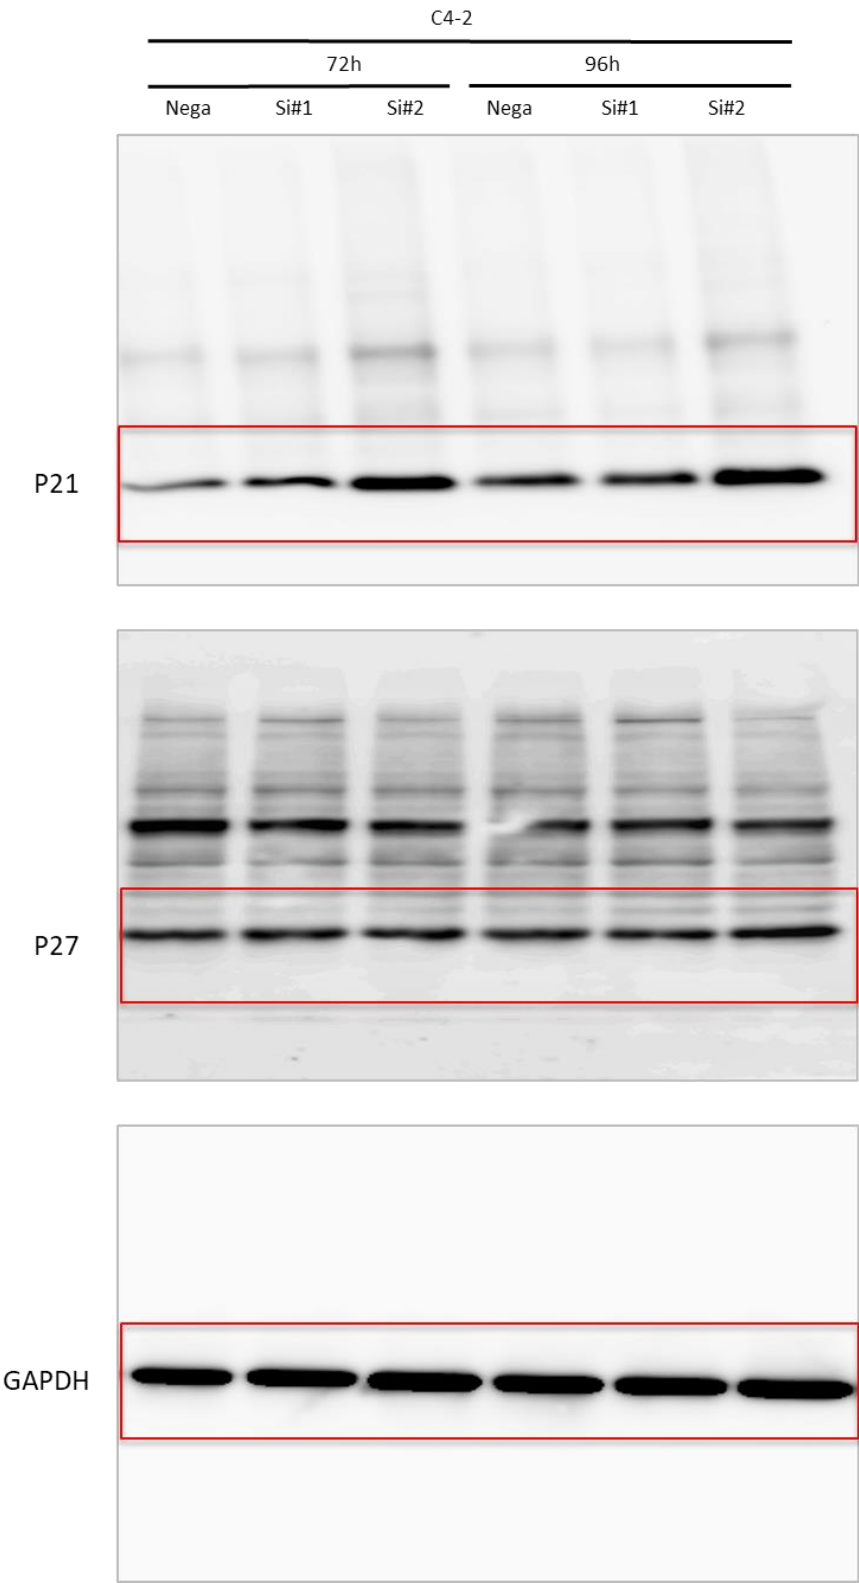

Supplement: Supplementary file 1 [file 72a4cb270b09465ca47c38d6.pdf]
